# Supplementary material
Source: HighWire-hosted journal article supplement (https://bmjopen.bmj.com/content/6/10/e012422)
Supplement: inline-supplementary-material-5 [file inline-supplementary-material-5.pdf]

**Supplementary Table 1:** Reasons for readmission in cohort and feasibility study

| Reasons for Readmissions                           | Cohort study | Feasibility study |
|----------------------------------------------------|--------------|-------------------|
| Repeat Fall                                        | 23           | 0                 |
| Repeat Fracture                                    | 4            | 0                 |
| Other accident or injury                           | 3            | 0                 |
| Adverse drug reaction                              | 0            | 0                 |
| Hospital acquired infection                        | 3            | 1                 |
| Revision of surgery                                | 1            | 0                 |
| Cardiac/respiratory arrest                         | 1            | 0                 |
| Other medical complication<br>e.g MI, DVT, CVA, PE | 28           | 2                 |
| Other                                              | 92           | 0                 |
| <b>Total</b>                                       | <b>155*</b>  | <b>3</b>          |

\*In the cohort study, there were 58 people with 1 readmission, 9 people with 2 readmissions and 2 people with 3 readmissions during the three-month follow up period. Some readmissions had multiple reasons (i.e. coded as both a repeat fall and a repeat fracture), resulting in a higher frequency of total reasons for readmission.

**Supplementary Table 2:** Reasons for withdrawal for patient and carer participants

| Participant Type             | Group          | Reason for Withdrawal                                                                                                        |
|------------------------------|----------------|------------------------------------------------------------------------------------------------------------------------------|
| Patient and associated carer | Intervention   | Did not feel they could fill in goal setting paperwork.                                                                      |
| Patient                      | Intervention   | Too unwell with other problems                                                                                               |
| Patient and associated carer | Intervention   | Burden, did not want any extra sessions                                                                                      |
| Patient and associated carer | Intervention   | Burden, other co-morbidities preventing participation in therapy sessions                                                    |
| Patient and associated carer | Control        | Were only taking part to get additional sessions                                                                             |
| Patient and associated carer | Control        | Were only taking part to get additional sessions, frustrated with lack of communication from usual health care services.     |
| Patient                      | Control        | Did not see the relevance of follow up questions                                                                             |
| Carer                        | Control        | Didn't have time to answer follow up questions                                                                               |
| Patient                      | Not randomised | Decided after consent that it was too much to take on                                                                        |
| Patient                      | Control        | Loss of mental capacity recorded on hospital administration system at follow up, confirmed by clinical team at nursing home. |

**Supplementary Table 3:** Completion rate for each measure collected in the trial

| Measure                                                | Baseline<br>(61 participants,<br>31 carers) | Follow-Up<br>(49 participants,<br>18 carers) |
|--------------------------------------------------------|---------------------------------------------|----------------------------------------------|
| Outcome Measure                                        |                                             |                                              |
| Abbreviated mental test score (AMTS)                   | 55 (90%)                                    | Not Collected                                |
| Barthel Index                                          | 59 (97%)                                    | 44 (89%)                                     |
| Carer Strain Index (CSI)                               | 28 (90%)                                    | 18 (100%)                                    |
| Client Service Receipt Inventory (CSRI)                | 59 (97%)*                                   | 37 (76%)                                     |
| EQ5D-3L                                                | 61 (100%)                                   | 61 (100%)                                    |
| Falls Efficacy Scale – International (FES-I)           | Not Collected                               | 37 (76%)                                     |
| General Self Efficacy Scale (GSES)                     | 58 (95%)                                    | 42 (69%)                                     |
| Hospital Anxiety and Depression Scale (HADS)           | 55 (90%)                                    | 45 (92%)                                     |
| Icepap Capability Measure for Older people (ICECAP-O)  | 58 (95%)                                    | 46 (94%)                                     |
| Nottingham Extended Activities of Daily Living (NEADL) | 56 (92%)                                    | 42 (69%)                                     |
| Self-Efficacy for Exercise Scale (SEE)                 | Not Collected                               | 36 (74%)                                     |
| Visual Analogue Score – Fear of Falling (VAS-FOF)      | Not Collected                               | 47 (96%)                                     |
| Visual Analogue Scale (VAS) for Hip Pain Intensity     | 60 (98%)                                    | 48 (79%)                                     |
| Physical Function Tests                                |                                             |                                              |
| Eight-Foot Get Up And Go Test                          | Not Collected                               | 37 (76%)                                     |
| Fifty Foot Walk Test                                   | Not Collected                               | 37 (76%)                                     |
| Grip Strength                                          | 55 (90%)                                    | 31 (62%)                                     |
| Thirty Second Sit To Stand                             | Not Collected                               | 37 (76%)                                     |
